# Supplementary material for: Loss of the PTCH1 tumor suppressor defines a new subset of plexiform fibromyxoma
Source: Springer Nature journal article supplement (doi:10.1186/s12967-019-1995-z), 2019-07-30

***β-actin***

***SHH***

***IHH***

***HHIP***

***PTCH1***

***SMO***

***GLI1***

***GLI2***

***GLI3***

***CCDN1***

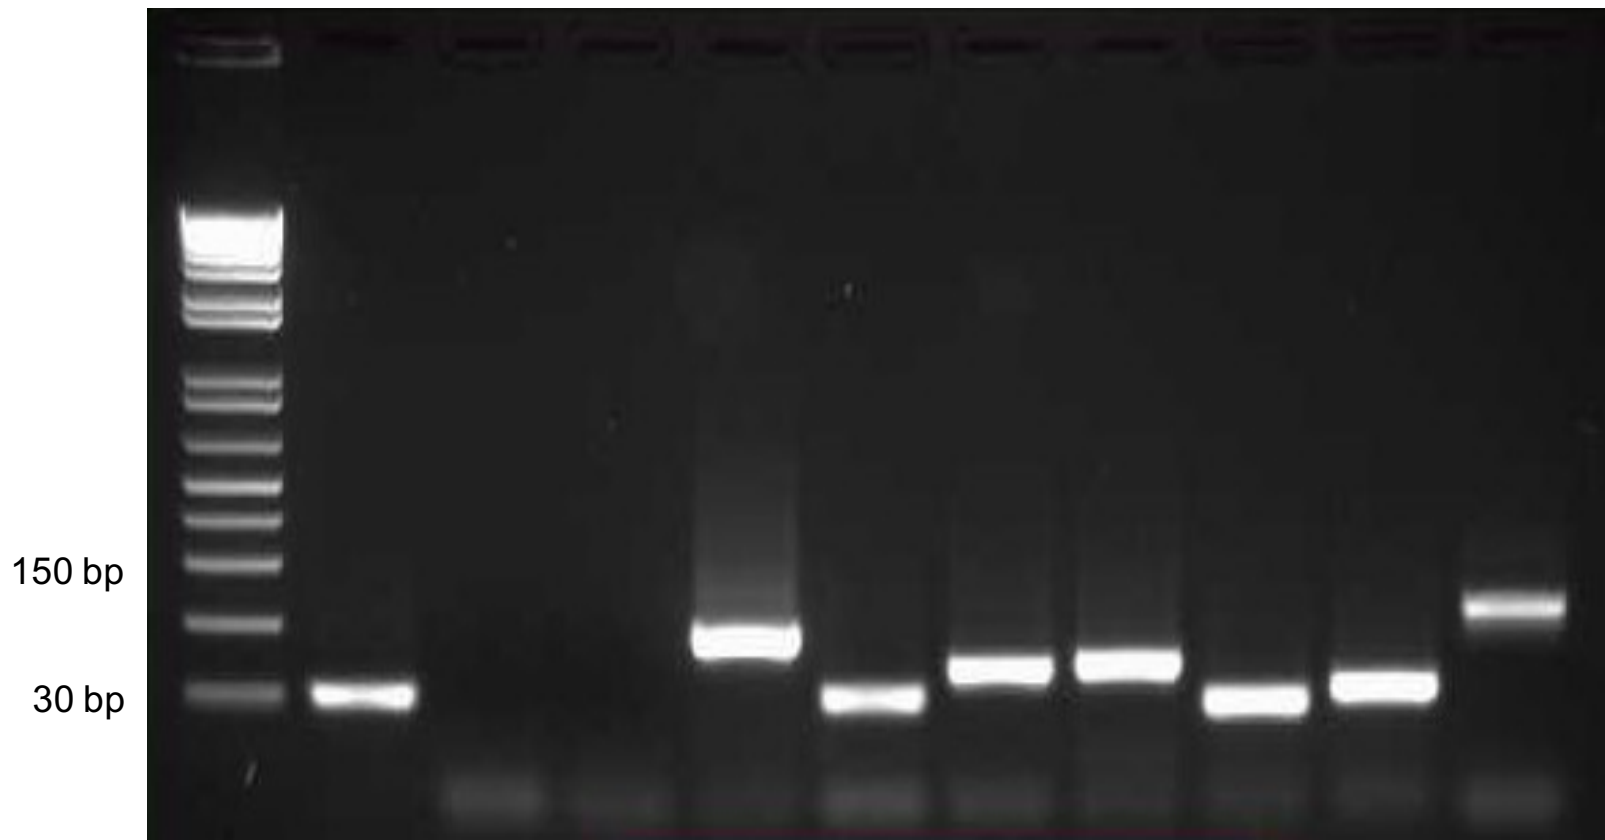

Supplement: MOESM1 [file 17023434]
