# Supplementary material for: Loss of the PTCH1 tumor suppressor defines a new subset of plexiform fibromyxoma
Source: Springer Nature journal article supplement (doi:10.1186/s12967-019-1995-z), 2019-07-30

**Luminescence Units  
(CellTiterGlo)**

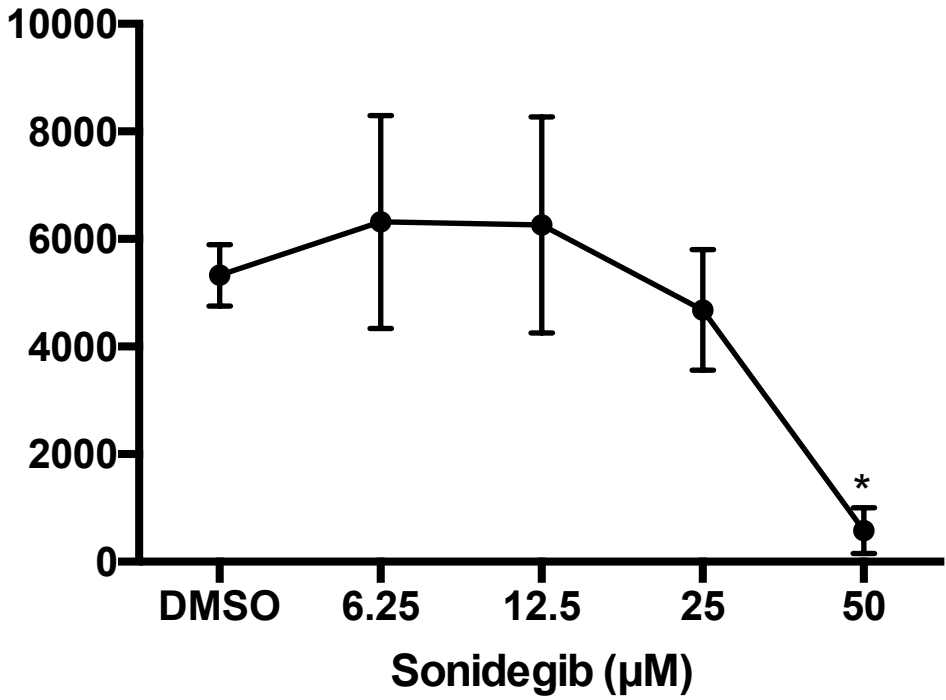

Supplement: MOESM2 [file 17023434]
